## RESEARCH ARTICLE

## STEM CELLS AND REGENERATION

# The nuclear hormone receptor family member NR5A2 controls aspects of multipotent progenitor cell formation and acinar differentiation during pancreatic organogenesis

Michael A. Hale<sup>1</sup>, Galvin H. Swift<sup>1</sup>, Chinh Q. Hoang<sup>1</sup>, Tye G. Deering<sup>1</sup>, Toshi Masui<sup>1</sup>, Youn-Kyoung Lee<sup>2,\*</sup>, Jumin Xue<sup>1</sup> and Raymond J. MacDonald<sup>1,†</sup>

## ABSTRACT

The orphan nuclear receptor NR5A2 is necessary for the stem-like properties of the epiblast of the pre-gastrulation embryo and for cellular and physiological homeostasis of endoderm-derived organs postnatally. Using conditional gene inactivation, we show that *Nr5a2* also plays crucial regulatory roles during organogenesis. During the formation of the pancreas, *Nr5a2* is necessary for the expansion of the nascent pancreatic epithelium, for the subsequent formation of the multipotent progenitor cell (MPC) population that gives rise to pre-acinar cells and bipotent cells with ductal and islet endocrine potential, and for the formation and differentiation of acinar cells. At birth, the NR5A2-deficient pancreas has defects in all three epithelial tissues: a partial loss of endocrine cells, a disrupted ductal tree and a >90% deficit of acini. The acinar defects are due to a combination of fewer MPCs, deficient allocation of those MPCs to pre-acinar fate, disruption of acinar morphogenesis and incomplete acinar cell differentiation. NR5A2 controls these developmental processes directly as well as through regulatory interactions with other pancreatic transcriptional regulators, including PTF1A, MYC, GATA4, FOXA2, RBPJL and MIST1 (BHLHA15). In particular, *Nr5a2* and *Ptf1a* establish mutually reinforcing regulatory interactions and collaborate to control developmentally regulated pancreatic genes by binding to shared transcriptional regulatory regions. At the final stage of acinar cell development, the absence of NR5A2 affects the expression of *Ptf1a* and its acinar specific partner *Rbpjl*, so that the few acinar cells that form do not complete differentiation. *Nr5a2* controls several temporally distinct stages of pancreatic development that involve regulatory mechanisms relevant to pancreatic oncogenesis and the maintenance of the exocrine phenotype.

**KEY WORDS:** Nr5a2, Pancreas, Acinar cell, Transcriptional control, Organogenesis, Mouse

## INTRODUCTION

Pancreatic organogenesis proceeds through several crucial regulatory stages (Cleaver and MacDonald, 2010; Rieck et al., 2012): (1) specification and emergence of the pancreatic epithelial buds from the distal foregut endoderm; (2) expansion of an early pancreatic progenitor cell population and developmental commitment; (3)

formation of a more restricted multipotent progenitor cell (MPC) population for endocrine, ductal and acinar tissues; (4) separation of committed pre-acinar cells at the tips of epithelial branches and a bipotent cell-population for islets and ducts in more central trunk domains; (5) separation of the endocrine and ductal programs, morphogenetic resolution of a precursor ductal plexus and completion of cell type-specific differentiation. This process creates three interrelated tissues: the islets of Langerhans (endocrine cells that produce polypeptide hormones, including insulin and glucagon), acini (exocrine cells that produce and secrete hydrolytic digestive enzymes) and ducts (exocrine cells that produce a bicarbonate flush and channel the acinar secretions to the intestine).

Much is known about the general roles of nearly thirty DNA-binding transcription factors and several intercellular signaling pathways required for proper pancreatic development (Cleaver and MacDonald, 2010; Pan and Wright, 2011; Serup, 2012). Yet, the molecular specifics of the regulatory transitions are incompletely understood – especially the formation of the multipotent cell population and the resolution of acinar precursor cells distinct from ductal and endocrine precursors. In this report, we show that NR5A2 is crucial for the proper formation of the multipotent cells and subsequently the acinar lineage.

NR5A2 (LRH1, FTF) is a member of the nuclear hormone receptor family (Becker-Andre et al., 1993) with diverse developmental and physiological functions (Lee and Moore, 2008; Fernandez-Marcos et al., 2011; Lazarus et al., 2012). *Nr5a2* has been associated with breast, colon, ovarian and pancreatic cancers (Lazarus et al., 2012). NR5A2 and its paralog NR5A1/SF-1 bind as monomers to extended half-site DNA response elements. NR5A2 binds and can be activated by phospholipids (Lee et al., 2011); this interaction does not appear to be necessary for its basal transcriptional activity (Sablin et al., 2003). The presence of a functional ligand-binding pocket suggests the potential to derive drugs that alter pathological, physiological or developmental processes affected by NR5A2 (Lazarus et al., 2012). NR5A2 activity is modulated by phosphorylation and sumoylation (Lee et al., 2006; Venter et al., 2010) and through interaction with co-activators (Xu et al., 2004; Sakai et al., 2006) and co-repressors (Goodwin et al., 2000; Suzuki et al., 2003). NR5A2 controls cell type-specific programs through direct transcriptional regulation of discrete subsets of target genes (Chen et al., 2008; Holmstrom et al., 2011; Chong et al., 2012).

During early development, *Nr5a2* is expressed in the inner cell mass of the blastocyst and in the epiblast (Paré et al., 2004; Gu et al., 2005). NR5A2 can substitute for OCT4 (POU5F1 – Mouse Genome Informatics) to induce stem cell-like pluripotency in adult fibroblast cells (Heng et al., 2010). The absence of NR5A2 causes the loss of *Oct4* expression in the epiblast and possible loss of pluripotency (Gu et al., 2005; Wagner et al., 2010), leading to the

<sup>1</sup>Department of Molecular Biology, University of Texas Southwestern Medical Center, Dallas, TX 75390-9148, USA. <sup>2</sup>Department of Pharmacology, University of Texas Southwestern Medical Center, Dallas, TX 75390-9041, USA.

\*Present address: Developmental and Molecular Pathways Department, Novartis Institutes for BioMedical Research, Cambridge, MA 02139, USA.

†Author for correspondence (raymond.macdonald@utsouthwestern.edu)

disruption of the primitive streak and failure of gastrulation (Labelle-Dumais et al., 2006). NR5A2 is normally present in the foregut endoderm at embryonic day 7.5 (E7.5) (Paré et al., 2001) and its expression continues in the intestine, liver and pancreas during endodermal development (Rausa et al., 1999; Annicotte et al., 2003). NR5A2 can activate hepatic genes in cell transfection experiments (Paré et al., 2001, 2004), but its role in developmental regulation of these genes and liver development is unproven, and *Nr5a2* inactivation during early hepatic development has no overt effect (Lee et al., 2008). The results of our study demonstrate a pleiotropic role for *Nr5a2* in pancreatic organogenesis.

In the adult pancreas, NR5A2 collaborates with PTF1A to control exocrine genes (Holmstrom et al., 2011). PTF1A is a class B bHLH transcription factor restricted to the pancreas, selected regions of the neural tube, retina and the cerebellum. The active form of PTF1A is an atypical trimeric complex containing a class A common bHLH protein (Roux et al., 1989; Rose et al., 2001) and an RBP protein, either RBPJ or RBPJL (Obata et al., 2001; Beres et al., 2006; Hori et al., 2008). The trimeric complex containing all three DNA-binding subunits is referred to as PTF1. Disruption of the complex eliminates transcriptional activity (Beres et al., 2006; Masui et al., 2007). The collaboration between NR5A2 and PTF1A requires the complete PTF1 complex (Holmstrom et al., 2011), and we show that this collaboration also occurs during fetal development.

In this report we demonstrate that *Nr5a2* is crucial during fetal organogenesis for the formation of the pancreas. A previous study of pancreas-specific *Nr5a2* inactivation late in fetal development detected only modest prenatal defects, the primary impact of which was the destabilization of the acinar phenotype post weaning (von Figura et al., 2014). Our analyses of two independent schemes of gene inactivation at the very onset of pancreatic development show that *Nr5a2* controls the expansion of the nascent pancreatic epithelium, the proper formation of the MPC population that gives rise to pre-acinar cells and bipotent cells with ductal and islet endocrine potential, and the proper formation and differentiation of pre-acinar cells. This might be attributed to a reinforcing regulatory triad of *Nr5a2*, *Ptf1a* and *Rbpjl* that controls additional pancreatic regulatory genes, including *Foxa2*, *Gata4* and *Myc*, as well as direct effectors of morphogenesis and cell type-specific differentiation.

## RESULTS

### *Nr5a2* expression increases in the epithelial ‘tip’ MPC population

We first placed NR5A2 in the context of known functional, stage-specific markers of pancreatic development. During the early stage at embryonic day 10.5 (E10.5), NR5A2 is restricted to regions of the endoderm, including the newly emergent dorsal and ventral pancreatic epithelia and the adjacent gall bladder primordium (Fig. 1A–E). The expression patterns of *Nr5a2* and *Pdx1*, a key regulator of the early progenitor cells (Jonsson et al., 1994; Offield et al., 1996; Gu et al., 2002), overlap between the posterior foregut and the anterior midgut endoderm. The PDX1 domain comprises the ventral and dorsal pancreatic epithelia and the intervening intestinal endoderm extending posteriorly (Fig. 1A',B'). NR5A2 overlaps with PDX1 in these regions and extends caudally along the PDX1-deficient intestinal endoderm (Fig. 1A'',B''). NR5A2 is co-localized with SOX9 (Fig. 1C'',D''), a functional marker of progenitor cells within the epithelium (Kopp et al., 2011).

When multipotent ‘tip’ domains begin to form at E11.5, NR5A2 is present throughout much of the epithelium (Fig. 1). NR5A2 is often co-localized with CPA1 and HNF1B/TCF2, two markers of pancreatic

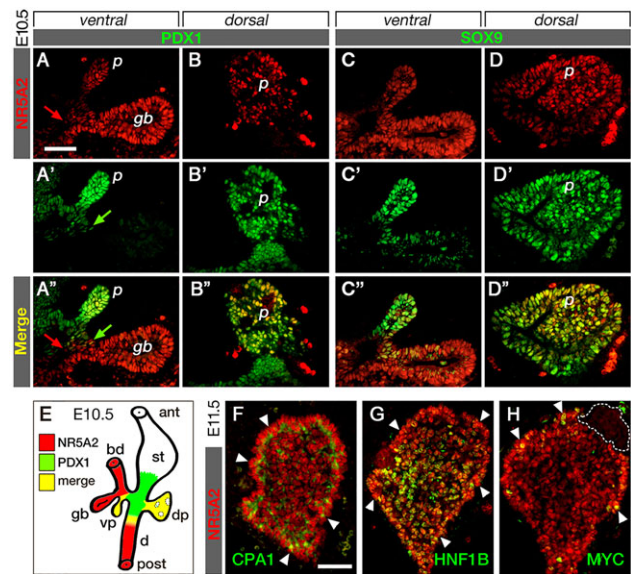

**Fig. 1. *Nr5a2* expression is dynamic during bud morphogenesis.**

(A–E) Immunofluorescence localization in ventral and dorsal buds of NR5A2 (A–D, red), PDX1 (A',B', green) and SOX9 (C',D', green) at E10.5. (A'–D'') merged images. *p*, pancreas; *gb*, gall bladder. Green arrows, posterior boundary of PDX1; red arrows, anterior boundary of NR5A2. (E) Summary of NR5A2 and PDX1 distributions at E10.5. *bd*, bile duct; *st*, stomach; *dp/vp*, dorsal/ventral pancreas; *d*, duodenum. (F–H) Colocalization of NR5A2 with CPA1 (F), HNF1B (G) and MYC (H) in dorsal epithelium at E11.5. Arrowheads, high NR5A2 levels in the periphery, where CPA1 and MYC are co-localized and HNF1B is largely excluded. Dashed line in H, first wave endocrine cell cluster is devoid of NR5A2. Scale bars: 50 μm.

MPCs at this stage (Zhou et al., 2007; Solar et al., 2009). Cells with high NR5A2 levels (NR5A2<sup>HI</sup>) are largely restricted to the peripheral layer of CPA1<sup>HI</sup> epithelial cells in contact with the surrounding mesenchyme (Fig. 1F). *Hnf1b*-expressing cells are preferentially in the interior, with about half containing NR5A2 (Fig. 1G). The levels of NR5A2 and HNF1B are inversely related: only 11% of the cells with high HNF1B levels are also high for NR5A2, and only 6% of the cells with high NR5A2 levels are also high for HNF1B (data not shown). NR5A2 is excluded from the differentiated first wave endocrine cells (Fig. 1H), as well as from all later appearing endocrine cells. The increased NR5A2 levels in the surface layer of epithelial cells coincide with the formation of the tip MPC population, which is also marked by the presence of MYC (Fig. 1H).

At E12.5, an early branching epithelium is decorated by small protrusions, the tips of which have CPA1, SOX9 and NR5A2 (Fig. 2), as well as low HNF1B and high PTF1A levels (e.g. see Fig. 7), consistent with the attributes of either MPCs or newly committed pre-acinar cells (Zhou et al., 2007; Pan et al., 2013). As the protrusions mature, the MPC population is depleted and the tips progress to acini. During the process of tip maturation (E13.5 and later), NR5A2 levels remain high along with CPA1 (Fig. 2A'–E') and PTF1A, whereas SOX9 levels diminish (Fig. 2F–J). By contrast, NR5A2 levels are low in the trunk regions of epithelial tubules expressing transcription factors that promote precursor status (i.e. high SOX9; Fig. 2F–J) or suppress differentiation (i.e. HES1; Fig. 2M) (Kopinke et al., 2011). Hybridization *in situ* confirmed a higher level of *Nr5a2* expression in pre-acini than in tubules (supplementary material Fig. S1B). NR5A2 levels remain high in tip cells during the transition from multipotency to preacinar unipotency.

NR5A2 is high in MPC-depleted tips at E15.5, which now form differentiating acini (Fig. 2K, PTF1A+; Fig. 2N, MUC1+; and



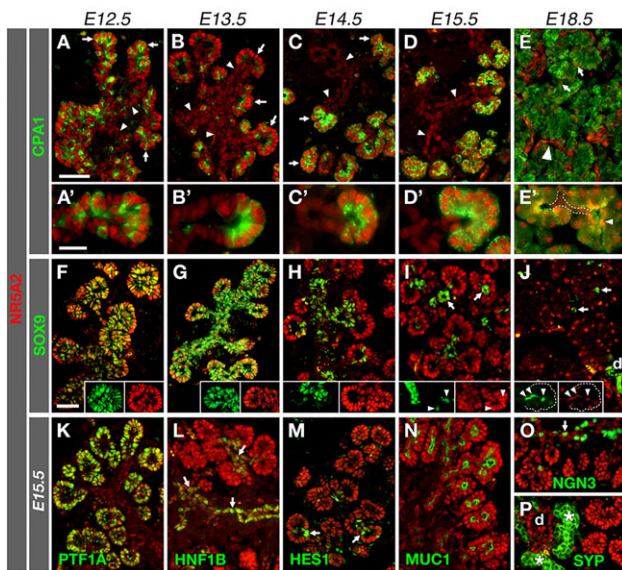

**Fig. 2. Expression of *Nr5a2* during development.** (A–F) By E12.5, NR5A2 levels are high in epithelial tips (arrows) that contain CPA1<sup>+</sup> MPCs and pre-acinar cells (A), and low in cells of SOX9<sup>+</sup> tubules (F). (A–D) Arrows, CPA1<sup>+</sup> and high NR5A2 levels; arrowheads, low NR5A2 levels in interior tubules. (E) Arrows, acinar nuclei with decreased NR5A2 levels; arrowhead, false staining of blood vessels at this stage. (A'–E') Higher magnification image of the conversion of CPA1<sup>+</sup> epithelial tips to nascent acini. (E') NR5A2 levels are low in acinar, intercalated duct (dashed lines) and centroacinar cells (arrowhead). (F–J) NR5A2 begins to segregate in tips at E13.5. At E14.5 and E15.5, most NR5A2<sup>HI</sup> cells lack SOX9. Arrows: high SOX9, low NR5A2 cells. (I, J) By E18.5, infrequent cells with both SOX9 and NR5A2 (arrowheads) are intercalated duct and centroacinar cells. Inserts show separate channels. d, duct. (K–P) E15.5 expression. (K) Cells with NR5A2<sup>HI</sup> co-express *Ptf1a*, which now marks differentiating acinar cells. (L) NR5A2<sup>LO</sup> is coincident with the HNF1B<sup>+</sup> cells of the tubules (arrows). (M) HES1 is in some cells (arrows) of the tubules, often at the entrance to acini, and in mesenchymal cells. HES1<sup>+</sup> cells are NR5A2<sup>LO</sup>. (N) MUC1 marks ducts (NR5A2<sup>LO</sup>) and acini (NR5A2<sup>HI</sup>). (O) High NGN3 cells are without NR5A2 (e.g. arrow). (P) Endocrine clusters with synaptophysin (Syp; asterisks) lack NR5A2. d, duct. Scale bars: A–E, 50  $\mu$ m; A'–E', 20  $\mu$ m; F–P, 50  $\mu$ m.

Fig. 2D, CPA1<sup>+</sup>), present at a continuing lower level in developing ducts (Fig. 2L, HNF1B<sup>+</sup>; Fig. 2M, HES1<sup>+</sup>; Fig. 2N, MUC1<sup>+</sup>; as well as Fig. 2I, SOX9<sup>+</sup>) and is excluded from cells of the endocrine lineage [Fig. 2O, NGN3<sup>+</sup>; Fig. 2P, synaptophysin<sup>+</sup> (Syp)].

NR5A2 is retained in cells of large and intercalated ducts as well as centroacinar cells, and is decreased in differentiated acinar cells at E18.5 (Fig. 2E, E', J) and adults (supplementary material Fig. S2). Yet, *Nr5a2* mRNA remains an abundant transcription factor mRNA (MacDonald et al., 2010).

This developmental expression pattern for *Nr5a2* was corroborated with an independently derived antibody directed against a non-overlapping region of NR5A2 (see supplementary material methods). The presence of NR5A2 in the HNF1B<sup>+</sup> and CPA1<sup>+</sup> cells that precede tip MPCs, its superinduction in MPCs, retention in pre-acinar, acinar and ductal cells, and its exclusion from islet cells and their immediate (NGN3<sup>+</sup>) precursors are all consistent with specific roles for NR5A2 in the formation of MPCs and subsequently in acinar development.

### Developmental defects in NR5A2-deficient pancreas

To assess these potential developmental roles, we examined mouse embryos homozygous for a floxed allele of *Nr5a2* (Lee et al., 2008) and heterozygous for *Cre* replacement of the coding sequence of the *Ptf1a* locus (Kawaguchi et al., 2002) (*Ptf1a*<sup>+/cre</sup>; *Nr5a2*<sup>flox/flox</sup>, hereafter named *Nr5a2* $\Delta$ P). Gene inactivation and depletion of NR5A2 protein were nearly complete by E12.5 (supplementary material Fig. S3). Note that the loss of immunoreactivity confirms the specificity of the anti-NR5A2 antibody. At this stage, the mutant epithelium was smaller than normal, due to fewer proliferating cells (Fig. 3A); infrequent apoptosis was unchanged in the mutant. The number of *Pdx1*-expressing progenitor cells was reduced by one-third, and that of *Ptf1a*-expressing cells by half (Fig. 3B). *Myc* is crucial for pancreatic epithelial cell replication at this stage (Nakhai et al., 2008; Bonal et al., 2009), and the total number of MYC<sup>+</sup> cells in the NR5A2-depleted pancreas decreased by 75% (Fig. 3B), and of PTF1A-MYC co-positive cells by 60% (Fig. 3C). Moreover, the level of MYC in individual cells was skewed to lower levels (Fig. 3D). These observations indicate that continued proliferation driven by MYC requires the presence of NR5A2.

By E18.5, the NR5A2-depleted pancreas has recognizable gastric, splenic and duodenal lobes, but the tissue is thin and nearly devoid of acini, which normally provide its bulk (Fig. 4A, E). Acinar tissue was less than 10% of normal levels (Fig. 4Q). In contrast to normal tissue, the NR5A2-deficient pancreas was a convoluted, anastomotic ductal epithelium with closely apposed endocrine cell clusters, and the few acinar structures were immature and restricted to the periphery (Fig. 4B, F).

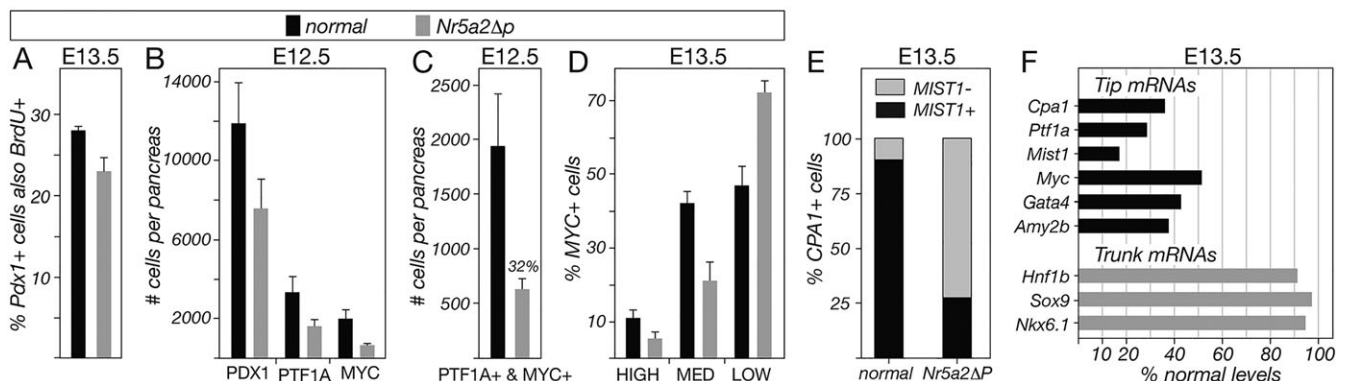

**Fig. 3. Effects of *Nr5a2* inactivation on growth and differentiation.** (A) Rate of cell proliferation was measured by the fraction of PDX1<sup>+</sup> cells that incorporate BrdU. (B) Total numbers of epithelial cells per pancreas with PDX1, PTF1A and MYC. (C) Total number of PTF1A-MYC co-positive cells decreased by two-thirds. (D) The fraction of cells and intensity of MYC immunofluorescence decreased in mutant pancreas. Error bars indicate s.e.m.; Student's *t*-test, unpaired. (E) The fraction of CPA1<sup>+</sup> pre-acinar cells that acquire MIST1 is lower in the mutant at E13.5. (F) RNA-seq results for *Nr5a2* $\Delta$ P mRNA levels compared with normal levels at E13.5.

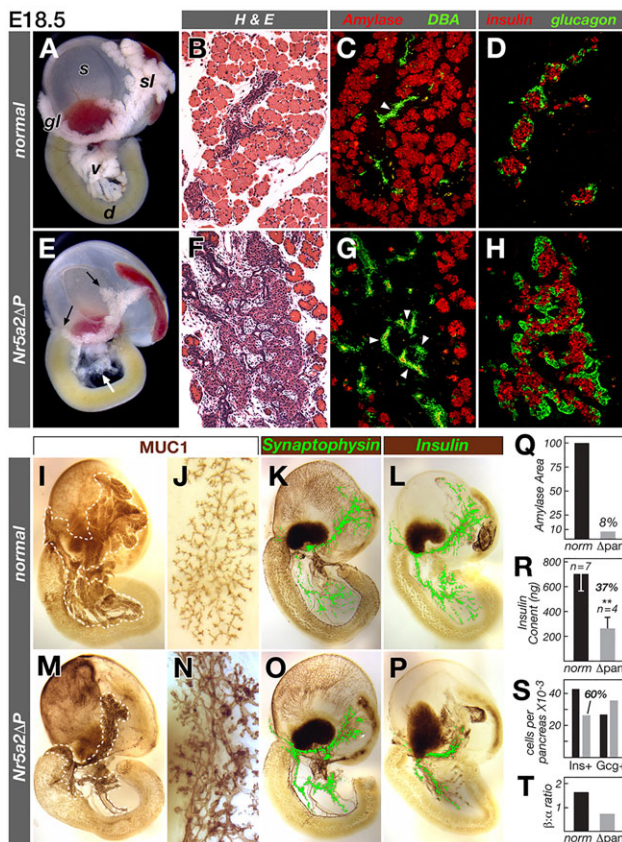

**Fig. 4. Defective formation of pancreatic epithelium in *Nr5a2ΔP* perinates.**

(A,E) Morphology of E18.5 splenic (sl) and gastric (gl) lobes of the dorsal pancreas, ventral pancreas (v), stomach (s) and duodenum (d) in normal and *Nr5a2ΔP* pancreas. All three pancreatic lobes are stunted (arrows). (B,F) H&E-staining shows characteristic paucity of acinar tissue in *Nr5a2ΔP*. (C,G) Immunofluorescence for amylase in sections adjacent to B and F reveals limited acinar tissue in the *Nr5a2ΔP* dorsal pancreas (8% of normal levels by quantitative morphometry, see Q), and DBA binding shows prominence ducts (white arrowheads). (D,H) Immunofluorescence for glucagon and insulin shows normal 'beads on a string' arrangement of  $\beta$ - and  $\alpha$ -cells (D), whereas *Nr5a2ΔP* endocrine tissue is compact and disorganized (H) with reduced  $\beta$ -/ $\alpha$ -cell ratio (see T). Whole-mount immunohistochemistry for MUC1 (I,M; dashed outlines), synaptophysin (K,O; green overlays) and insulin (L,P; green overlays). (J,N) The normal MUC1+ ductal tree ends with thin intercalated ducts and intra-acinar apical surfaces (see also supplementary material Fig. S4C,E), whereas the mutant ductal system is an unresolved plexus of large ducts (higher resolution image in N) with emanating short ducts that terminate in dilated intra-acinar lumens (see also supplementary material Fig. S4D,F). (R) Total insulin content of *Nr5a2ΔP* pancreas is 37% of normal levels. Error bars indicate s.d. (S) Numbers of insulin- and glucagon-expressing cells. All data are for E18.5 pancreas. Student's *t*-test, unpaired.

The *NR5A2*-deficient ducts have distended lumina (supplementary material Fig. S4, E18.5), yet the cells are differentiated, as judged from the intense staining by DBA and of MUC1 (compare Fig. 4C,I,J with Fig. 4G,M,N). The fine acinar-proximal intercalated ducts do not form. Rather than a simple branching tree (Fig. 4J), much of the mutant ductal system remains a plexus (Fig. 4N), suggesting that the absence of *NR5A2* prevents the resolution of the transitory plexus previously described (Kesavan et al., 2009; Villasenor et al., 2010). The amount of endocrine tissue appears nearly normal (compare Fig. 4K,L with Fig. 4O,P), but is compressed within a smaller volume and retains the cord-like morphology of less mature islets (Fig. 4D,H). The mutant pancreas at E18.5 contains approximately 60% less insulin, 40%

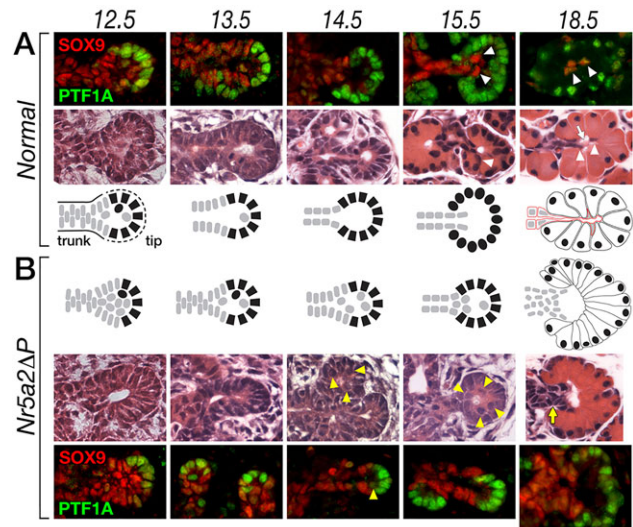

**Fig. 5. Defective acinar morphogenesis in *NR5A2*-deficient embryonic pancreas.** (A) H&E staining shows acinar structures characteristic of each age; immunofluorescence distinguishes the cells of precursor epithelial tubules (SOX9+) and pre-acinar cells (PTF1A+). The early multilayered epithelium of the tips resolves and nascent acinar cells over-cap the termini of intercalated ducts by E14.5. Arrowheads, centroacinar cells; white arrow, cell-cell contact between centroacinar cells. (B) Abnormal acinar development of *Nr5a2ΔP* embryos. Over-capping is delayed and aberrant, with residual interior cells (yellow arrowheads), intercalated ducts with multiple cell layers (yellow arrow) and absence of centroacinar cells by E18.5.

fewer  $\beta$ -cells and a lower ratio of  $\beta$ - to  $\alpha$ -cells (1.6 versus 0.7 for normal; Fig. 4R-T), consistent with fewer endocrine cells born from MPCs during the secondary transition. Thus, depletion of *NR5A2* by E12.5 affects the development of islet, ductal and acinar tissues, but limits the formation and differentiation of acinar cells preferentially.

Mice born with an *NR5A2*-deficient pancreas survived, but their postnatal growth was stunted; seven-month-old male mice were approximately 26% smaller (Student's *t*-test, unpaired;  $P=0.004$ ). The adult islets have normal architecture, but individual endocrine cells, principally glucagon expressing, were scattered throughout the parenchyma (supplementary material Fig. S5). Adult mice had normal fasting glucose levels and tolerance to a glucose challenge (data not shown). Acinar mass recovered to approximately 30% (25–33%) of normal levels in adult mice. The acinar tissue was predominantly poorly branched elongated tubes rather than blind-ended acini and domains of fibrosis with fat replacement, exocrine cell apoptosis and unusual hybrid acinar/ductal structures reminiscent of acinar-ductal metaplastic transitions (supplementary material Fig. S5).

### The loss of *NR5A2* prevents normal acinar formation

To discover the developmental processes controlled by *Nr5a2*, we analyzed defects at key developmental transitions.

#### Normal acinus formation

The formation of acini begins with the evacuation of cells within the evaginating epithelial tips, so that by E14.5 most nascent acini have the appearance of a single-cell layer epithelial 'cap' at the end of a short immature ductule (Fig. 5A). At E15.5, cellular growth appears to force the pre-acinar cap over the terminus of the intercalated duct. Centroacinar cells (Fig. 5A) are often detected deep in the acinar lumen and form continuous cell-cell contacts (Fig. 5A, 18.5, arrow) with the intercalated duct cells by E18.5.



### Morphogenetic defects

Acinar defects of *Nr5a2ΔP* epithelia are first detected at E12.5: fewer proacinar tips occur and clearance of cells within the tips has not yet begun (Fig. 5). Subsequently, substantially fewer pre-acini form, and mature slower and less completely than normal. Evacuation of interior cells of multilayered tips is incomplete at E15.5, two days later than normal (Fig. 5B, yellow arrowheads), and acinar over-capping of the terminal intercalated duct has not occurred. Acinar caps do extend over the ductule ends at E18.5; however, the termini of ducts are malformed, with multiple cell layers and no apparent lumen (Fig. 5B, 18.5, yellow arrow). Acinar morphology is immature: more and smaller cells per acinus, fewer secretory granules and lower levels of secretory enzyme mRNAs (see below), although apical-basal polarity is maintained. The larger number of cells per acinus and the disorganized acinar:ductal junctions suggest a defect in the branching process that would otherwise divide the acini into smaller units during growth.

### Effects on acinar developmental gene expression

Analyses of the E13.5 mRNA populations from normal and NR5A2-depleted pancreas by RNA-Seq identified 317 differentially expressed genes (false discovery rate, *fdr* < 0.05) with mRNA

levels that differed 1.6-fold or more (Fig. 6A; supplementary material Table S2). In total, 225 genes had lower and 92 had higher mRNA levels than normal. Eighty-five percent of the genes with decreased mRNA levels were linked to genomic regions of NR5A2 binding, with the presence of an NR5A2 consensus-binding sequence at 42% of those bound sites. Consensus-binding sequences for FOXA and GATA factors were also enriched at the NR5A2-bound sites. By contrast, only 67% of the genes with apparent increased expression were associated with NR5A2 binding, none had an NR5A2 consensus-binding sequence and no binding sequence motifs were enriched. Therefore, the upregulated genes are probably not controlled directly by NR5A2; instead, their expression appears to increase because the next developmental stage dependent on NR5A2 is not properly initiated and mRNAs for functions of early organogenesis persist (Fig. 6B).

The most prominent attribute of the *Nr5a2ΔP* mutants was the arrest of acinar cell development, which was due to curtailed expression of regulators of the transition to mature acinar cells and proteins characteristic of acinar differentiation or mature acinar cells (supplementary material Table S2). For example, mRNAs for 21 acinar secretory proteins, including 13 digestive pro-enzymes, decreased 1.6-fold or more. We re-measured 11 of these mRNAs by

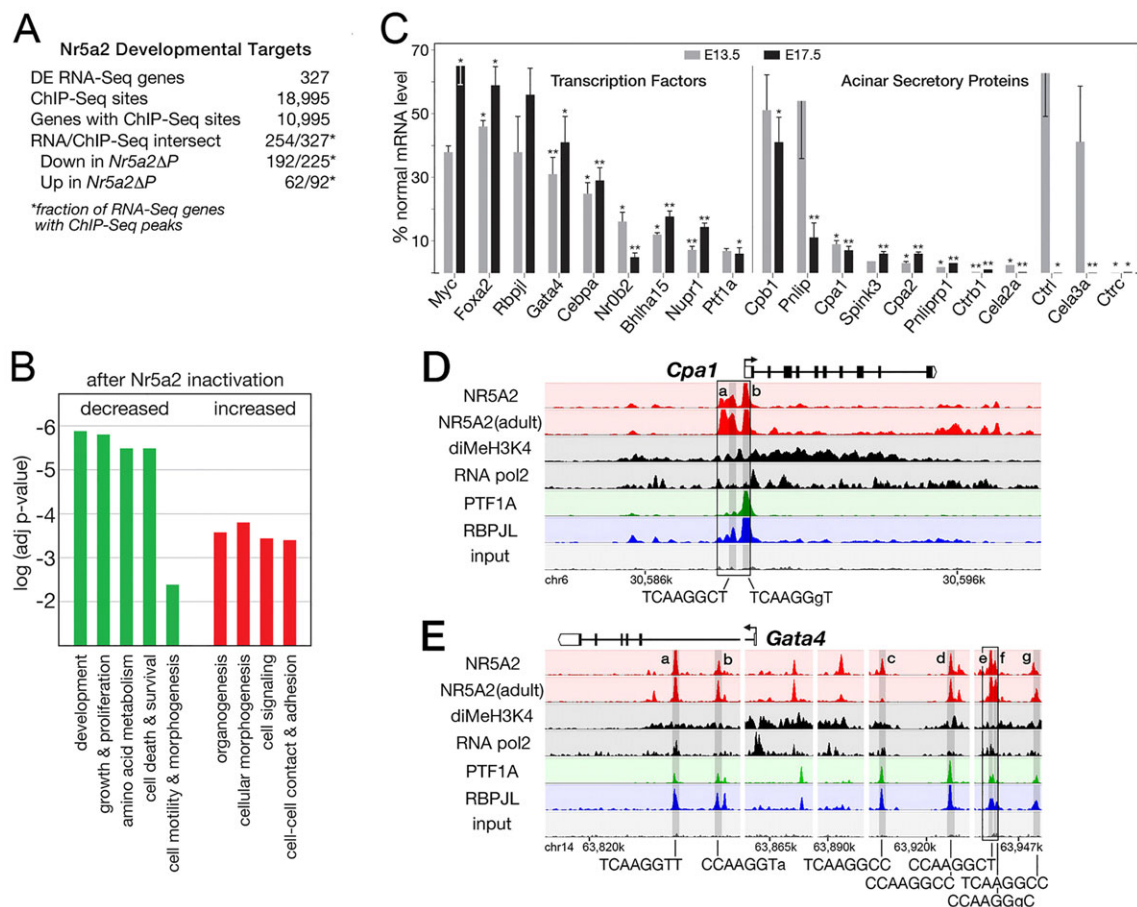

**Fig. 6. Altered gene expression at E13.5 and E17.5 indicates defects in acinar differentiation, cell cycle control and branching morphogenesis.**

(A) Overview of NR5A2 targets derived from the intersection of mRNA changes detected by RNA-Seq analyses (at E13.5) and genes associated with NR5A2 binding in chromatin by ChIP-Seq (at E17.5). (B) Selected gene ontology categories of affected genes. (C) qRT-PCR measurement of the mRNAs for selected genes. Levels are relative to normal E13.5 or E17.5, with s.d. shown; Student's *t*-test, unpaired. (D,E) Co-localized binding of NR5A2, PTF1A and RBPJL at positions of active chromatin marks (H3K4me2 and RNApol2) in E17.5 chromatin for examples of genes for a secretory digestive enzyme (CPA1) and an acinar transcription factor (GATA4) affected by NR5A2 loss. Gray bars indicate NR5A2 binding overlapping with PTF1A, RBPJL, H3K4me2 and RNApol2. NR5A2 consensus-binding sequences (see Fig. 8D) near peak centers are indicated. Boxes enclose gene regions that direct expression of a transgenic reporter selectively to pancreas (*Cpa1*, 1.3 kb) (Meredith et al., 2013) and to pancreas, stomach and duodenum (*Gata4*, 0.9 kb) (Rojas et al., 2009).

qRT-PCR and confirmed that their levels were 40 to >99% lower than normal at E13.5 (Fig. 6C). Consistent with continued defects during acinar development, the relative levels of the mRNAs for these proteins were even lower at E17.5 (Fig. 6C). NR5A2 is normally bound to regulatory regions of these genes at this stage (Fig. 6D; supplementary material Fig. S6; data not shown). For example, the locus for CPA1, a prominent secretory carboxypeptidase, has three sites of NR5A2 binding in a 1.2-kb promoter-proximal region. These sites have functional marks of active transcriptional control regions: co-localization of other acinar specific factors (PTF1A and RBPJL) and enrichment of H3K4me2 and RNAPol2. This 1.2-kb region is sufficient to direct pancreatic acinar-specific expression in transgenic mouse embryos (Meredith et al., 2013).

Suppressed acinar development is consistent with decreased expression of the known pancreatic regulators *Ptf1a*, *Myc*, *Gata4*, *Rbpjl* and *Mist1* (*Bhlha15* – Mouse Genome Informatics) (Fig. 6C). Other transcriptional regulators present selectively at high levels in mature acinar cells (MacDonald et al., 2010) were also reduced 50% or more: *Spdef*, *Bhlhe40/Dec1*, *Nr0b2*, *Nupr1*, *Cebpd*, *Ovol2* and *Phox2b*. NR5A2 is bound to probable regulatory regions of these genes at E17.5. For example, *Gata4* is required for proper acinar differentiation (Xuan et al., 2012), is decreased 2.5–3.0-fold at E13.5 and E17.5 in the *Nr5a2* mutant and has six sites with high NR5A2 occupancy, all of which have co-localized PTF1A, RBPJL, H3K4me2 and RNAPol2 (Fig. 6E). The region with co-localized peaks at –80 kb was active selectively in the pancreas when tested in transgenic animals (Rojas et al., 2009). Most of these regulatory genes are known to affect the embryonic development of other organ systems, and therefore are also likely to be direct targets of NR5A2 that control aspects of pancreatic development.

Genes of the GDNF/RET signaling pathway, which controls branching morphogenesis of the uterine bud (Costantini and Shakya, 2006; Costantini, 2010), are affected by the loss of NR5A2 (supplementary material Fig. S7). The mRNAs for the ligand GDNF, the tyrosine-kinase receptor RET and for DUSP6 are prominent early and at mid-development. GDNF and RET mRNAs decreased 3.0- and 2.4-fold in NR5A2-depleted pancreatic epithelium at E13.5, respectively, when the ductal tree is being shaped. The mRNA for DUSP9, a paralog of the dual-function

phosphatase DUSP6, which controls the persistence of the activated RET, decreased 2.5-fold. ETV4 and ETV5, which mediate RET-activated transcriptional control, are prominent in developing pancreas at this stage and are restricted to the branching epithelial tips (Kobberup et al., 2007), but their mRNA levels are unaffected in the *Nr5a2* mutant. NR5A2 is bound to pancreatic transcriptional control regions of each of these genes, based on co-localization with the PTF1-L complex and markers of active enhancers (supplementary material Fig. S7).

### Defects in the transition of MPCs to committed pre-acinar cells

To identify potential causes of the disrupted acinar development, we focused on transcriptional regulators affected by NR5A2-depletion (Fig. 6C). At the onset of acinar development, fewer cells in the mutant epithelial tips expressed *Ptf1a* and *Myc* (Fig. 3B and Fig. 7A). *Myc* mRNA levels were reduced by half (Fig. 6C), consistent with fewer replicating acinar cells. MYC is crucial for the proliferation of MPC and acinar cells, but not for other pancreatic cell types (Nakhai et al., 2008; Bonal et al., 2009). NR5A2 is present at an NR5A2 consensus-binding sequence in the *Myc* locus during development and in adulthood. Decreased expression of additional key cell cycle control genes associated with chromatin-bound NR5A2 (*Cdk11*, *Cdkn1a/p21*, *Plk2*; supplementary material Table S2 and Fig. S7F–H) further indicates that cell proliferation depends directly on NR5A2.

To measure the progression from MPCs to newly committed acinar cells requires markers that distinguish these two cell types. MPCs are identified by the presence of PTF1A, CPA1 and high levels of MYC (Fig. 7A, ‘tip’ markers) and the absence of amylase (Zhou et al., 2007). However, cells recently committed to acinar fate are expected to have the same marker set until the appearance of amylase, which is a later, post-acinar commitment event. Distinguishing the two states is particularly problematic for E12.5 epithelial tips, which are expected to have a mixed population of MPCs and committed pre-acinar cells. From their coupled analysis of stage-identifying markers and lineage tracing of *Ptf1a*-expressing cells, Pan and colleagues developed a solid foundation for monitoring the transition from multipotency to proacinar unipotency (Pan et al., 2013). SOX9, HNF1B and NKX6.1

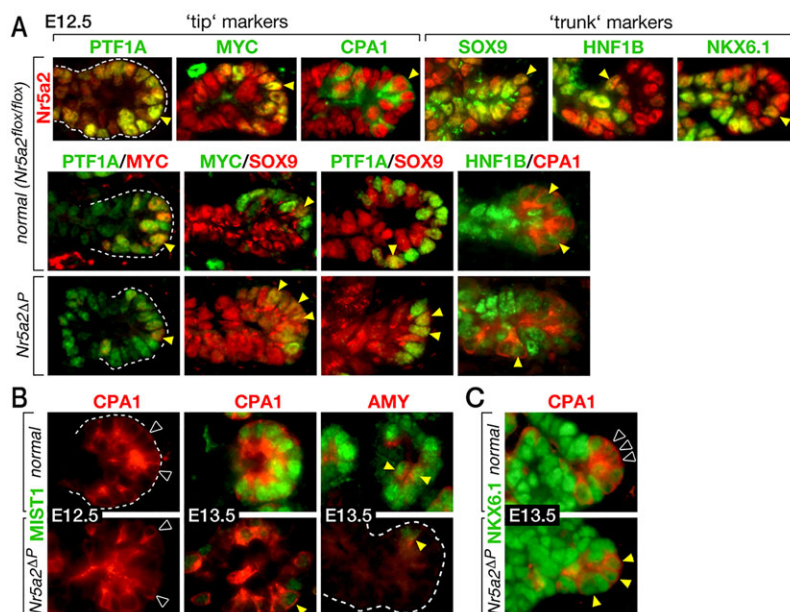

**Fig. 7. Formation of MPCs is defective in *Nr5a2ΔP*.** (A) Co-localization of NR5A2 with tip MPC and tubule markers at E12.5. Yellow arrowheads, examples of cells or nuclei with NR5A2 colocalized with markers. (B) Delayed appearance of MIST1 at E13.5. Open arrowheads, CPA1+ cells without MIST1; yellow arrowheads, co-expression of MIST1 with CPA1 or amylase. Note the very low MIST1 levels in *Nr5a2ΔP* at E13.5. (C) Delayed departure of NKX6.1 from tips of *Nr5a2ΔP*. Dashed lines, examples of maturing epithelial tips.

are present in MPCs during normal development and become excluded from the acinar lineage beginning at about E13.5 (Solar et al., 2009; Schaffer et al., 2010; Kopp et al., 2011). These three transcription factors linger in the tip cells of NR5A2-depleted pancreas (Fig. 7A,C), and their mRNA levels do not decline at E13.5 (Fig. 3F). For example, 16% of CPA1+ cells in normal E13.5 pancreas have NKX6.1, whereas 87% of CPA1+ cells retain NKX6.1 in the NR5A2-depleted pancreas.

MIST1/BHLHA15 is an early acinar specific marker (Pin et al., 2001). At E12.5, none of the CPA1+ (0/610) progenitor cells in normal pancreatic epithelia had detectable MIST1 levels (Fig. 7B); one day later, 90% did (Fig. 3E). By contrast, only 27% of the CPA1+ cells in NR5A2-deficient pancreas were MIST1+ at E13.5. Moreover, the level of MIST1 in individual cells was much reduced (Fig. 7B), and this reduction might contribute to the incomplete acinar differentiation of later stages. The appearance of amylase was similarly delayed. The persistence of markers shared by MPCs and trunk cells (SOX9, HNF1B and NKX6.1) and the reduction of the markers MIST1 and amylase indicate that, in addition to fewer MPCs, their progression to acinar development is slowed by the absence of NR5A2.

The loss of MPCs in *Ptf1a*<sup>+/-Cre</sup>;*Nr5a2*<sup>flx/flx</sup> embryos was incomplete, probably due to delayed expression and action of *Cre* expressed from the *Ptf1a* locus. To address this issue, we examined *Nr5a2*<sup>flx/flx</sup> embryos bearing a *Pdx1-Cre* transgene (Gu et al., 2002) that is active earlier in the pancreatic endoderm than *Ptf1a* (Burlison et al., 2008). *Pdx1-Cre*<sup>early</sup>;*Nr5a2*<sup>flx/flx</sup> embryos had a much greater disruption of the MPC population, and consequently of the formation of fewer acini and  $\beta$ -cells (supplementary material Fig. S8), with the exception of domains of normal acinar tissue composed of NR5A2+ cells that escaped *Nr5a2* inactivation (data not shown).

### The PTF1 complex drives *Nr5a2* expression in the pancreas

To examine the regulation of *Nr5a2*, we searched for and analyzed the transcriptional control regions active in the developing pancreas. *Ptf1a* appears to control the expression of *Nr5a2*. The level of NR5A2 protein and the number of *Nr5a2*-expressing cells were greatly diminished in PTF1A-deficient embryonic pancreas (supplementary material Fig. S9). To determine whether *Ptf1a* controls *Nr5a2* transcription directly, we examined the binding of PTF1A and RBPJL to chromatin from embryonic and adult pancreases. The results of ChIP-seq experiments identified four sites at the *Nr5a2* locus with overlapping binding of PTF1A and RBPJL, indicating the presence of the PTF1-L complex (Fig. 8A). Two of the bound sites are within a 1.2-kb conserved upstream region (CUR) common to birds as well as mammals, and the sites themselves are highly conserved (Fig. 8F). The distal site conforms to the PTF1 consensus-binding sequence, and quantitative measure by conventional ChIP-PCR confirmed the presence of PTF1A on this site (Fig. 8E). RNApol2 and nucleosomes containing the active H3K4me2 chromatin mark are also present.

To determine whether the 1.2-kb CUR is enhancer-like and dependent on PTF1, we generated transgenes bearing the CUR linked to a minimal promoter with a *lacZ* reporter gene. Transgenic expression at E17.5 was specific to the acinar cells in the pancreas with high penetrance (18 of 27 transgenic embryos) (Fig. 8G). The transgene was not active in other organs in which *Nr5a2* is present, such as liver and ovary, but endogenous  $\beta$ -galactosidase in the intestine precludes the detection of low transgenic expression. Thus, the CUR is sufficient for selective transcription to the pancreas.

The dependency of CUR activity on PTF1 binding was demonstrated by results with two altered transgenic constructs. First, disrupting the distal PTF1-binding site of the CUR by base changes within the TC-box prevents binding of the trimeric PTF1 complex as well as of an Rbp subunit alone, and virtually eliminated transgenic expression:  $\beta$ -galactosidase was detected in only a few scattered cells in only one of 13 independent transgenic embryos (Fig. 8G, *TC-mut*). Second, altering the distal PTF1-binding site by inserting a half-turn of DNA between the E-box and the TC-box also nearly eliminated the activity of the CUR (Fig. 8G, 1.5 turn). This is a particularly rigorous test, because binding by the trimeric PTF1 complex requires paired E- and TC-boxes with unit DNA helical turn spacing (Beres et al., 2006; Thompson et al., 2012). Thus, the activity of the CUR depends on the distal PTF1-binding site, which in turn requires the binding of the complete PTF1 complex, and not on the binding of the bHLH subcomplex or an RBP subunit independently.

### *Nr5a2*, *Ptf1a* and *Rbpjl* compose an interacting regulatory triad

*Nr5a2* inactivation diminished the expression of *Ptf1a* and *Rbpjl* at E13.5 by 93% and 62%, respectively, by 94% and 37% (Fig. 6C) at E17.5 and by 51% for *Ptf1a* after induced gene inactivation in adult pancreas (Holmstrom et al., 2011). To determine whether these effects could be due to direct regulation by NR5A2, we examined the binding of NR5A2 to *Ptf1a* and *Rbpjl* loci at E17.5 and adulthood, when PTF1A and RBPJL are restricted to differentiating and differentiated acinar cells. NR5A2 was bound to four and two sites of the *Ptf1a* and *Rbpjl* loci, respectively, in E17.5 chromatin (Fig. 8B,C). Each site contains a sequence that closely conforms to the NR5A2-binding consensus. The major NR5A2-bound site in *Rbpjl* is within the 1.4-kb enhancer/promoter region shown to be active in the pancreas of transgenic mice (Masui et al., 2007), and adjacent to a bound PTF1 complex necessary for the enhancer/promoter activity (Fig. 8C). Similarly, the 2.3-kb *Ptf1a* autoregulatory enhancer has NR5A2 bound in close proximity to one of the two PTF1-bound sites necessary for its activity. The extensive regulatory interactions and mutually dependent expression among these three developmental control genes suggest that they form a mutually reinforcing triad that drives acinar development.

### DISCUSSION

The spatiotemporal expression pattern of *Nr5a2* and the consequences of the *Nr5a2* inactivation at different developmental stages indicate that *Nr5a2* has at least three temporally distinct functions during pancreatic organogenesis (supplementary material Fig. S10). *Nr5a2* is important for the formation and maintenance of the MPCs of the secondary transition, for allocation of MPCs to the acinar lineage and for expansion and differentiation of pre-acinar cells.

Depletion of NR5A2 during the MPC-stage using *Ptf1a*<sup>Cre</sup> decreased the number of cells bearing MPC markers, and the development of all three tissue types that derive from the MPC population was affected. Prenatal insulin content and  $\beta$ -cell mass were reduced by two-thirds, acinar mass by more than nine-tenths and branching of the ductal epithelium was mismanaged and unfinished. Additional developmental defects from NR5A2 depletion were restricted to acinar tissue. Fewer MPCs were allocated to the acinar lineage compared with the endocrine lineage. Because MYC is crucial for the proliferation of differentiating acinar cells but not of endocrine or ductal cells (Nakhai et al., 2008; Bonal et al., 2009), expansion of the pre-acinar cell population was selectively curtailed



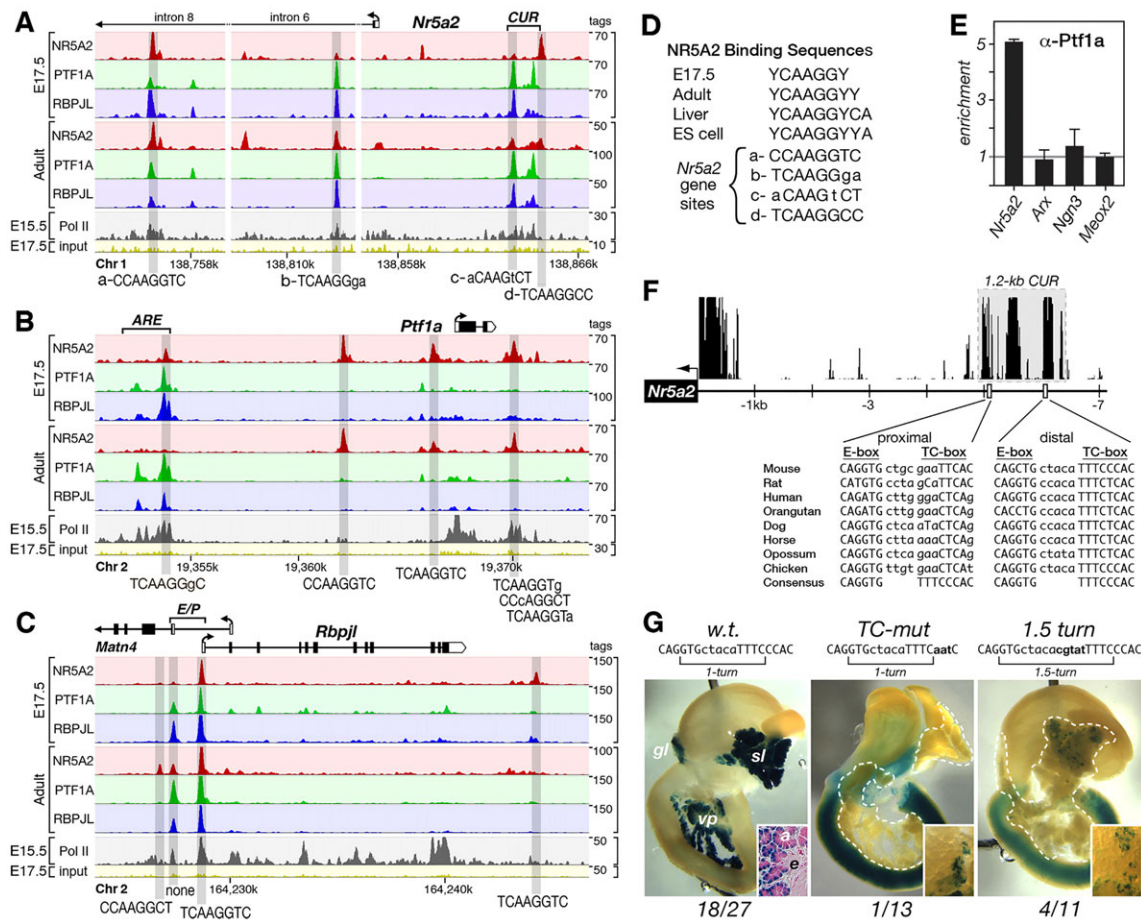

**Fig. 8. The *Nr5a2* CUR is a pancreas-specific enhancer dependent on PTF1 binding.** (A–C) ChIP-Seq analyses with chromatin from E17.5 and adult pancreas identify sites bound by NR5A2, PTF1A or RBPJL at *Nr5a2*, *Ptf1a* and *Rbpjl* loci. ARE is the *Ptf1a* autoregulatory enhancer; E/P is the *Rbpjl* enhancer-promoter region. Other markings are similar to Fig. 6D,E. (D) Consensus NR5A2-binding sequences from E17.5 (this study), adult pancreas (Holmstrom et al., 2011), adult liver (Chong et al., 2012) and mouse ES cells (Heng et al., 2010). (F) Phylogenetic conservation of the 5' flanking region of *Nr5a2* using BLAT (Kent, 2002). The two sites bound by PTF1A and RBPJL (open rectangles) contain conserved E- and TC-boxes spaced one DNA turn apart. The distal site conforms precisely to the PTF1-binding consensus, and PTF1A binding was confirmed by quantitative measurement by ChIP-PCR (E). PTF1A was not enriched at three loci (*Arx*, *Ngn3/Neurog3*, *Meox2*) active in non-exocrine compartments of the pancreas and without PTF1-binding elements. Error bars are s.d.; Student's *t*-test, unpaired. (G) The CUR directs pancreas-specific expression of a *lacZ* reporter in E17.5 embryos that is dependent on an intact distal PTF1-binding site. *w.t.*, unaltered CUR. Expression was detected in 18 of 27 founder transgenic embryos and uniform throughout the pancreas in nine embryos. Inset, staining of the nuclear  $\beta$ -galactosidase in acinar (a), but not in endocrine (e), ductal or connective tissue cells in an eosin-stained section from the pancreas. *TC-mut*, mutation of the TC-box disrupts transgene expression. Inset, detail from the single embryo that had only a few pancreatic cells that stained for  $\beta$ -galactosidase. *1.5 turn*, insertion of 5 bp between the E- and TC-boxes also disrupts transgene expression. Inset, scattered cells stained in four of 11 transgenic embryos. Dorsal and ventral lobes of pancreas are outlined (dashed lines).

by the loss of *Nr5a2*-dependent *Myc* expression. Moreover, the differentiation of the few pre-acinar cells that formed was delayed and incomplete. Thus, the more pronounced mutant phenotype of acinar tissue than for endocrine or ductal tissues is due to these cumulative effects on acinar development.

Earlier inactivation of *Nr5a2*, prior to the tip MPC stage, by *Pdx1-Cre<sup>early</sup>* (Gu et al., 2002) rather than by *Ptf1a-Cre*, caused more severe and balanced developmental defects of exocrine and endocrine tissues. Growth of the early bud epithelium, dependent on MPCs, was more acutely curtailed. With the exception of small regions that escaped NR5A2 depletion due to the incomplete action of *Pdx1-Cre<sup>early</sup>*, the deleterious effects on the formation of both acinar and  $\beta$ -cells were much greater than with *Ptf1a-Cre*-mediated inactivation.

By contrast, late *Nr5a2* inactivation using *PdxCre<sup>late</sup>* had much less effect on development than through *Ptf1a-Cre*, although some impairment of acinar terminal development was evident (von Figura

et al., 2014). The *PdxCre<sup>late</sup>* transgene is effective after the MPC stage, because  $\beta$ -galactosidase-labeled ductal cells have been rarely observed in *PdxCre<sup>late</sup>;R26R* mice (Heiser et al., 2006). The effects of NR5A2-depletion at the post-MPC stage appear restricted to the completion of acinar differentiation and are consistent with the need for maintenance of acinar cell identity (Holmstrom et al., 2011; Flandez et al., 2014; von Figura et al., 2014).

### MPC and pre-acinar cell expansion

The emergence of the MPC population around the periphery and in the tips of the expanding epithelium corresponds to the onset of the 'secondary developmental transition' (Pictet and Rutter, 1972; Pictet et al., 1972). The secondary transition initiates the resolution of acinar and bipotent duct/endocrine lineages from the MPCs, extensive epithelial growth and branching emanating from epithelial 'tips', induction and delamination of islet cell precursors (principally pre- $\beta$ -cells) and formation of committed pre-acinar



cells – all of which are descendants of the modified MPCs (Zhou et al., 2007; Pan et al., 2013). A better understanding of the factors that regulate the secondary transition will inform strategies to produce and expand equivalent MPCs from embryonic or induced pluripotent stem cells, and to direct the resolution *in vitro* toward endocrine  $\beta$ -cells over acinar and ductal cells.

Our results demonstrate that inactivation of *Nr5a2* disrupts the secondary transition by limiting the formation and expansion of MPCs and pre-acinar cells. NR5A2 directly sustains *Myc* expression, and the loss of MYC in NR5A2-deficient pancreatic epithelium is coincident with the onset of hypotrophy. Developmental defects that accrue from inactivation of *Nr5a2* are very similar to those of *Myc* inactivation (Nakhai et al., 2008; Bonal et al., 2009). Depletion of MYC reduces cell replication, expansion of the MPC epithelium and NGN3+ endocrine precursor cells by E12.5. At birth, islet tissue and insulin content appear reduced to one-half, ductal arborization is poor and acinar tissue is severely hypoplastic, with *Ptf1a* and *Mist1* mRNA levels less than half of normal levels. The few remaining acinar cells are smaller, less differentiated and the total amount of amylase is 7% of normal amounts (Nakhai et al., 2008; Bonal et al., 2009).

*Myc* is also a target of Wnt/ $\beta$ -catenin signaling (He et al., 1998), and the effect of inactivating *Ctnnb1* in the early pancreas largely phenocopies that of *Myc* inactivation (Murtaugh et al., 2005; Wells et al., 2007). Remarkably, the parallel with *Nr5a2* inactivation extends further: inactivation of *Ctnnb1* by the late-expressing version of *Pdx1-Cre* had little effect on acinar development (Dessimoz et al., 2005), just as *Pdx-Cre<sup>late</sup>* had for *Nr5a2* inactivation (von Figura et al., 2014). Thus, for all three gene deficiencies, early inactivation reduces the acinar compartment preferentially, and the pancreatic gland at birth is principally a complex ductal structure with associated islets and with sparse, poorly developed acini. It is probable that NR5A2 and  $\beta$ -catenin cooperate to maintain *Myc* expression during the MPC phase of development. In some instances, NR5A2 replaces the LEF/TCF factors as the DNA-binding component for Wnt-directed  $\beta$ -catenin gene regulation (Fernandez-Marcos et al., 2011). A similar regulatory relationship might sustain MPC and acinar cell replication during pancreatic development.

### Cross- and collaborative regulation among *Nr5a2*, *Ptf1a* and *Rbpjl* during development

NR5A2 binds and regulates the known pancreas-restricted developmental regulators *Gata4*, *Foxa2*, *Mist1*, *Ptf1a* and *Rbpjl*, as well as *Myc*. The regions of these genes bound by NR5A2 are active pancreas-specific transcriptional enhancers in transgenic mice (Masui et al., 2007, 2008; Rojas et al., 2009; Meredith et al., 2013) (Mei Jiang, T.G.D., G.H.S. and R.J.M., unpublished). The colocalization of PTF1A and RBPJL at many of these same genomic sites reflects frequent collaboration between NR5A2 and the PTF1 complex, and co-immunoprecipitation experiments indicate that NR5A2 and PTF1A can reside in the same complex (Holmstrom et al., 2011).

Moreover, NR5A2, PTF1A and RBPJL bind each others pancreatic enhancers, and the PTF1A and RBPJL binding sites are necessary for the activity of the enhancers in transgenic fetal pancreas (Fig. 8; Masui et al., 2007, 2008). Our results indicate that this binding is important during development, because *Ptf1a* and *Rbpjl* expression decreases dramatically after *Nr5a2* inactivation, and, conversely, *Nr5a2* expression is lost upon *Ptf1a* inactivation. Thompson and colleagues have shown that PTF1A also resides on the *Nr5a2* enhancer region that we identified in this study in

chromatin from an immortalized acinar cell line that has a gene expression profile consistent with embryonic progenitor cell character (Thompson et al., 2012). Thus, it appears that the regulatory interactions persist throughout pancreatic development. *Nr5a2* and *Ptf1a* are crucial at several developmental stages, so that each must change which sets of genes they control as development progresses. It will be informative to discern the roles they play in changing the developmental gene regulatory network during pancreatic development and how their collaboration is preserved for different sets of genes at progressive developmental stages. A summary of the gene regulatory interactions derived from this study is provided in supplementary material Fig. S11.

Greater insight into the nature, formation and expansion of pancreatic MPCs could be applied to improving the yield of  $\beta$ -like cells from pluripotent cells *in vitro*. In this regard, NR5A2 might have a special utility: its functional ligand-binding pocket offers the opportunity for natural (Lee et al., 2011) or synthetic compound agonists to enhance NR5A2-driven formation of the MPCs, then suppress NR5A2 activity with inverse agonists (Busby et al., 2010) to bias endocrine cell formation by suppressing acinar cell fate.

## MATERIALS AND METHODS

### Genetically modified mouse lines

*Ptf1a<sup>Cre</sup>* mice have the protein-coding region of *Ptf1a* replaced by that of Cre recombinase, containing an N-terminal nuclear localization signal (Kawaguchi et al., 2002). *Pdx1-tTA* mice have the protein-coding region of *Pdx1* replaced with that of tTA<sub>off</sub> (Holland et al., 2002). *Nr5a2<sup>flox/flox</sup>* mice have the *Nr5a2* exon 5, which codes for the second zinc-finger of the DNA-binding domain, flanked by lox-P sites (Lee et al., 2008). *Nr5a2* conditional knockout mice (*Nr5a2 $\Delta$ P*) are homozygous for the floxed allele of *Nr5a2* and heterozygous for Cre recombinase replacement of the *Ptf1a* gene. *Pdx1-Cre<sup>early</sup>* mice contain the Cre recombinase gene driven by the mouse 5.5-kb *Pdx1* promoter (Gu et al., 2002). Details of the cloning and transgenic analysis of *Nr5a2* regulatory regions are provided in the supplementary material methods. University of Texas Southwestern Institutional Animal Care and Use Committee approved all of the animal experiments.

### Chromatin immunoprecipitation studies and transcriptome analyses

For this study, we performed ChIP-Seq of E17.5 pancreatic chromatin for NR5A2, H3K4me2 and RNA polymerase II. Preparation of mouse pancreatic chromatin, immunoprecipitation, quantification, preparation of Illumina sequencing libraries and their analysis were performed as described previously (Meredith et al., 2013), with details and modifications described in the supplementary material methods.

Comprehensive analysis of the mRNA population in E13.5 normal or *Nr5a2 $\Delta$ P* pancreas was performed by RNA-Seq, using total RNA pooled from three normal pancreases or pooled from three *Nr5a2 $\Delta$ P* pancreases. RNA-Seq analysis of the E17.5 pancreas has been reported previously (Masui et al., 2010; Meredith et al., 2013). Differentially expressed genes were identified using edgeR (McCarthy et al., 2012).

### Dissections, tissue preparation and immunostaining

Histology and immunohistology were performed as described previously (Masui et al., 2007, 2008). Details and procedural modifications are in the supplementary material methods; primary and secondary antibodies are listed in supplementary material Table S1.

### Acknowledgements

We are grateful to A. Villaseñor and O. Cleaver (University of Texas Southwestern Medical Center, Dallas, USA) for discussions regarding duct formation, C. V. E. Wright (Vanderbilt University, Nashville, USA) for the *Ptf1a<sup>Cre</sup>* mice, and G. Gu (Vanderbilt University, Nashville, USA), D. A. Melton (Harvard University, Cambridge, USA) and O. Cleaver for the *Pdx1-Cre<sup>early</sup>* mice. We also thank C. V. E. Wright, S. F. Konieczny (Purdue University, West Lafayette, USA), M. Wegner (University of Erlangen-Nuremberg, Germany) and O. D. Madsen (Hagedorn Research Institute, Denmark) of the Antibody Core of the Beta Cell

Biology Consortium (DK61244) for providing antibodies. We also thank M. Hebrok and G. von Figura for helpful discussions, and J. E. Johnson, S. R. Holmstrom and S. A. Kliewer for expert comments on the manuscript.

### Competing interests

The authors declare no competing financial interests.

### Author contributions

M.A.H., G.H.S. and R.J.M. designed the experiments. M.A.H., G.H.S., C.Q.H., T.G.D., T.M., Y.-K.L. and J.X. performed the experiments and analyzed the data. M.A.H., G.H.S. and R.J.M. prepared the figures, wrote and revised the manuscript.

### Funding

This work was supported by the National Institutes of Health [R01-DK61220 and BCBC U01-DK89570]. Deposited in PMC for release after 12 months.

### Supplementary material

Supplementary material available online at

<http://dev.biologists.org/lookup/suppl/doi:10.1242/dev.109405/-/DC1>

### References

- Annicotte, J.-S., Fayard, E., Swift, G. H., Selander, L., Edlund, H., Tanaka, T., Kodama, T., Schoonjans, K. and Auwerx, J. (2003). Pancreatic-duodenal homeobox 1 regulates expression of liver receptor homolog 1 during pancreas development. *Mol. Cell. Biol.* **23**, 6713-6724.
- Becker-Andre, M., Andre, E. and Delamarier, J. F. (1993). Identification of nuclear receptor mRNAs by RT-PCR amplification of conserved zinc-finger motif sequences. *Biochem. Biophys. Res. Commun.* **194**, 1371-1379.
- Beres, T. M., Masui, T., Swift, G. H., Shi, L., Henke, R. M. and MacDonald, R. J. (2006). PTF1 is an organ-specific and Notch-independent basic helix-loop-helix complex containing the mammalian Suppressor of Hairless (RBP-J) or its paralogue, RBP-L. *Mol. Cell. Biol.* **26**, 117-130.
- Bonal, C., Thorel, F., Ait-Lounis, A., Reith, W., Trumpp, A. and Herrera, P. L. (2009). Pancreatic inactivation of c-Myc decreases acinar mass and transdifferentiates acinar cells into adipocytes in mice. *Gastroenterology* **136**, 309-319. e9.
- Burlison, J. S., Long, Q., Fujitani, Y., Wright, C. V. E. and Magnuson, M. A. (2008). Pdx-1 and Ptf1a concurrently determine fate specification of pancreatic multipotent progenitor cells. *Dev. Biol.* **316**, 74-86.
- Busby, S., Nuhant, P., Cameron, M., Mercer, B. A., Hodder, P., Roush, W. R. and Griffin, P. R. (2010). Discovery of Inverse Agonists for the Liver Receptor Homologue-1 (LRH1; NR5A2) Probe Reports from the NIH Molecular Libraries Program: National Center for Biotechnology Information (US).
- Chen, X., Xu, H., Yuan, P., Fang, F., Huss, M., Vega, V. B., Wong, E., Orlov, Y. L., Zhang, W., Jiang, J. et al. (2008). Integration of external signaling pathways with the core transcriptional network in embryonic stem cells. *Cell* **133**, 1106-1117.
- Chong, H. K., Biesinger, J., Seo, Y.-K., Xie, X. and Osborne, T. F. (2012). Genome-wide analysis of hepatic LRH-1 reveals a promoter binding preference and suggests a role in regulating genes of lipid metabolism in concert with FXR. *BMC Genomics* **13**, 51.
- Cleaver, O. and MacDonald, R. J. (2010). Developmental molecular biology of the pancreas. In *Handbook of Pancreatic Cancer* (ed. J. Neoptolemos, J. Abbruzzese, M. Buchler and R. Urrutia). pp. 71-117. New York: Springer.
- Costantini, F. (2010). GDNF/Ret signaling and renal branching morphogenesis: from mesenchymal signals to epithelial cell behaviors. *Organogenesis* **6**, 252-262.
- Costantini, F. and Shakya, R. (2006). GDNF/Ret signaling and the development of the kidney. *Bioessays* **28**, 117-127.
- Dessimoz, J., Bonnard, C., Huelsenken, J. and Grapin-Botton, A. (2005). Pancreas-specific deletion of beta-catenin reveals Wnt-dependent and Wnt-independent functions during development. *Curr. Biol.* **15**, 1677-1683.
- Fernandez-Marcos, P. J., Auwerx, J. and Schoonjans, K. (2011). Emerging actions of the nuclear receptor LRH-1 in the gut. *Biochim. Biophys. Acta* **1812**, 947-955.
- Flandez, M., Cendrowski, J., Canamero, M., Salas, A., Del Pozo, N., Schoonjans, K. and Real, F. X. (2014). Nr5a2 heterozygosity sensitizes to, and cooperates with, inflammation in KRasG12V-driven pancreatic tumorigenesis. *Gut* **63**, 647-655.
- Goodwin, B., Jones, S. A., Price, R. R., Watson, M. A., McKee, D. D., Moore, L. B., Galardi, C., Wilson, J. G., Lewis, M. C., Roth, M. E. et al. (2000). A regulatory cascade of the nuclear receptors FXR, SHP-1, and LRH-1 represses bile acid biosynthesis. *Mol. Cell* **6**, 517-526.
- Gu, G., Dubauskaite, J. and Melton, D. A. (2002). Direct evidence for the pancreatic lineage: NGN3+ cells are islet progenitors and are distinct from duct progenitors. *Development* **129**, 2447-2457.
- Gu, P., Goodwin, B., Chung, A. C.-K., Xu, X., Wheeler, D. A., Price, R. R., Galardi, C., Peng, L., Latour, A. M., Koller, B. H. et al. (2005). Orphan nuclear receptor LRH-1 is required to maintain Oct4 expression at the epiblast stage of embryonic development. *Mol. Cell. Biol.* **25**, 3492-3505.
- He, T.-C., Sparks, A. B., Rago, C., Hermeking, H., Zawel, L., da Costa, L. T., Morin, P. J., Vogelstein, B. and Kinzler, K. W. (1998). Identification of c-MYC as a target of the APC pathway. *Science* **281**, 1509-1512.
- Heiser, P. W., Lau, J., Taketo, M. M., Herrera, P. L. and Hebrok, M. (2006). Stabilization of  $\beta$ -catenin impacts pancreas growth. *Development* **133**, 2023-2032.
- Heng, J.-C. D., Feng, B., Han, J., Jiang, J., Kraus, P., Ng, J.-H., Orlov, Y. L., Huss, M., Yang, L., Lufkin, T. et al. (2010). The nuclear receptor Nr5a2 can replace Oct4 in the reprogramming of murine somatic cells to pluripotent cells. *Cell Stem Cell* **6**, 167-174.
- Holland, A. M., Hale, M. A., Kagami, H., Hammer, R. E. and MacDonald, R. J. (2002). Experimental control of pancreatic development and maintenance. *Proc. Natl. Acad. Sci. USA* **99**, 12236-12241.
- Holmstrom, S. R., Deering, T., Swift, G. H., Poelwijk, F. J., Mangelsdorf, D. J., Kliewer, S. A. and MacDonald, R. J. (2011). LRH-1 and PTF1-L coregulate an exocrine pancreas-specific transcriptional network for digestive function. *Genes Dev.* **25**, 1674-1679.
- Hori, K., Cholewa-Waclaw, J., Nakada, Y., Glasgow, S. M., Masui, T., Henke, R. M., Wildner, H., Martarelli, B., Beres, T. M., Epstein, J. A. et al. (2008). A non-classical bHLH-Rbpj transcription factor complex is required for specification of GABAergic neurons independent of Notch signaling. *Genes Dev.* **22**, 166-178.
- Jonsson, J., Carlsson, L., Edlund, T. and Edlund, H. (1994). Insulin-promoter-factor 1 is required for pancreas development in mice. *Nature* **371**, 606-609.
- Kawaguchi, Y., Cooper, B., Gannon, M., Ray, M., MacDonald, R. J. and Wright, C. V. E. (2002). The role of the transcriptional regulator PTF1a in converting intestinal to pancreatic progenitors. *Nat. Genet.* **32**, 128-134.
- Kent, W. J. (2002). BLAT - The BLAST-like alignment tool. *Genome Res.* **12**, 656-664.
- Kesavan, G., Sand, F. W., Greiner, T. U., Johansson, J. K., Kobberup, S., Wu, X., Brakebusch, C. and Semb, H. (2009). Cdc42-mediated tubulogenesis controls cell specification. *Cell* **139**, 791-801.
- Kobberup, S., Nyberg, P., Juhl, K., Hutton, J. and Jensen, J. (2007). ETS-family genes in pancreatic development. *Dev. Dyn.* **236**, 3100-3110.
- Kopinke, D., Brailsford, M., Shea, J. E., Leavitt, R., Scaife, C. L. and Murtaugh, L. C. (2011). Lineage tracing reveals the dynamic contribution of Hes1+ cells to the developing and adult pancreas. *Development* **138**, 431-441.
- Kopp, J. L., Dubois, C. L., Schaffer, A. E., Hao, E., Shih, H. P., Seymour, P. A., Ma, J. and Sander, M. (2011). Sox9+ ductal cells are multipotent progenitors throughout development but do not produce new endocrine cells in the normal or injured adult pancreas. *Development* **138**, 653-665.
- Labelle-Dumais, C., Jacob-Wagner, M., Paré, J.-F., Belanger, L. and Dufort, D. (2006). Nuclear receptor NR5A2 is required for proper primitive streak morphogenesis. *Dev. Dyn.* **235**, 3359-3369.
- Lazarus, K. A., Wijayakumara, D., Chand, A. L., Simpson, E. R. and Clyne, C. D. (2012). Therapeutic potential of Liver Receptor Homolog-1 modulators. *J. Steroid Biochem. Mol. Biol.* **130**, 138-146.
- Lee, Y.-K. and Moore, D. D. (2008). Liver receptor homolog-1, an emerging metabolic modulator. *Front. Biosci.* **13**, 5928-5949.
- Lee, Y.-K., Choi, Y.-H., Chua, S., Park, Y. J. and Moore, D. D. (2006). Phosphorylation of the hinge domain of the nuclear hormone receptor LRH-1 stimulates transactivation. *J. Biol. Chem.* **281**, 7850-7855.
- Lee, Y.-K., Schmidt, D. R., Cummins, C. L., Choi, M., Peng, L., Zhang, Y., Goodwin, B., Hammer, R. E., Mangelsdorf, D. J. and Kliewer, S. A. (2008). Liver receptor homolog-1 regulates bile acid homeostasis but is not essential for feedback regulation of bile acid synthesis. *Mol. Endocrinol.* **22**, 1345-1356.
- Lee, J. M., Lee, Y. K., Mamrosh, J. L., Busby, S. A., Griffin, P. R., Pathak, M. C., Ortlund, E. A. and Moore, D. D. (2011). A nuclear-receptor-dependent phosphatidylcholine pathway with antidiabetic effects. *Nature* **474**, 506-510.
- MacDonald, R. J., Swift, G. H. and Real, F. X. (2010). Transcriptional control of exocrine pancreas development and homeostasis. In *Development, Differentiation and Disease of the Para-alimentary Tract*, Vol. 97 (ed. K. H. Kaestner), pp. 1-40. Burlington: Academic Press.
- Masui, T., Long, Q., Beres, T. M., Magnuson, M. A. and MacDonald, R. J. (2007). Early pancreatic development requires the vertebrate Suppressor of Hairless (RBPJ) in the PTF1 bHLH complex. *Genes Dev.* **21**, 2629-2643.
- Masui, M., Swift, G. H., Hale, M. A., Meredith, D., Johnson, J. E. and MacDonald, R. J. (2008). Transcriptional autoregulation controls pancreatic Ptf1a expression during development and adulthood. *Mol. Cell. Biol.* **28**, 5458-5468.
- Masui, T., Swift, G. H., Deering, T., Shen, C., Coats, W. S., Long, Q., Elsässer, H.-P., Magnuson, M. A. and MacDonald, R. J. (2010). Replacement of Rbpj with Rbpjl in the PTF1 complex controls the final maturation of pancreatic acinar cells. *Gastroenterology* **139**, 270-280.
- McCarthy, D. J., Chen, Y. and Smyth, G. K. (2012). Differential expression analysis of multifactor RNA-Seq experiments with respect to biological variation. *Nucleic Acids Res.* **40**, 4288-4297.
- Meredith, D. M., Borromeo, M. D., Deering, T. G., Casey, B. H., Savage, T. K., Mayer, P. R., Hoang, C., Tung, K.-C., Kumar, M., Shen, C. et al. (2013). Program specificity for Ptf1a in Pancreas versus Neural Tube Development correlates with distinct collaborating cofactors and chromatin accessibility. *Mol. Cell. Biol.* **33**, 3166-3179.
- Murtaugh, L. C., Law, A. C., Dor, Y. and Melton, D. A. (2005).  $\beta$ -catenin is essential for pancreatic acinar but not islet development. *Development* **132**, 4663-4674.



- Nakhai, H., Siveke, J. T., Mendoza-Torres, L. and Schmid, R. M. (2008). Conditional inactivation of Myc impairs development of the exocrine pancreas. *Development* **135**, 3191–3196.
- Obata, J., Yano, M., Mimura, H., Goto, T., Nakayama, R., Mibu, Y., Oka, C. and Kawaichi, M. (2001). p48 subunit of mouse PTF1 binds to RBP-Jkappa/CBF-1, the intracellular mediator of Notch signalling, and is expressed in the neural tube of early stage embryos. *Genes Cells* **6**, 345–360.
- Offield, M. F., Jetton, J. L., Labosky, P. A., Ray, M., Stein, R. W., Magnuson, M. A., Hogan, B. L. M. and Wright, C. V. E. (1996). PDX-1 is required for pancreatic outgrowth and differentiation of the rostral duodenum. *Development* **122**, 983–995.
- Pan, F. C. and Wright, C. (2011). Pancreas organogenesis: from bud to plexus to gland. *Dev. Dyn.* **240**, 530–565.
- Pan, F. C., Bankaitis, E. D., Boyer, D., Xu, X., Van de Casteele, M., Magnuson, M. A., Heimberg, H. and Wright, C. V. E. (2013). Spatiotemporal patterns of multipotentiality in Ptf1a-expressing cells during pancreas organogenesis and injury-induced facultative restoration. *Development* **140**, 751–764.
- Paré, J.-F., Roy, S., Galarneau, L. and Bélanger, L. (2001). The mouse fetoprotein transcription factor (FTF) gene promoter is regulated by three GATA elements with tandem E box and Nkx motifs, and FTF in turn activates the Hnf3beta, Hnf4alpha, and Hnf1alpha gene promoters. *J. Biol. Chem.* **276**, 13136–13144.
- Paré, J.-F., Malenfant, D., Courtemanche, C., Jacob-Wagner, M., Roy, S., Allard, D. and Bélanger, L. (2004). The fetoprotein transcription factor (FTF) gene is essential to embryogenesis and cholesterol homeostasis and is regulated by a DR4 element. *J. Biol. Chem.* **279**, 21206–21216.
- Pictet, R. and Rutter, W. J. (1972). Development of the embryonic endocrine pancreas. In *Handbook of Physiology. Section 7: Endocrinology*, vol. I. *Endocrine Pancreas* (ed. D. F. Steiner and N. Freinkel). pp. 25–66. Baltimore: Williams and Wilkins.
- Pictet, R. L., Clark, W. R., Williams, R. H. and Rutter, W. J. (1972). An ultrastructural analysis of the developing embryonic pancreas. *Dev. Biol.* **29**, 436–467.
- Pin, C. L., Rukstalis, J. M., Johnson, C. and Konieczny, S. F. (2001). The bHLH transcription factor Mist1 is required to maintain exocrine pancreas cell organization and acinar cell identity. *J. Cell Biol.* **155**, 519–530.
- Rausa, F. M., Galarneau, L., Bélanger, L. and Costa, R. H. (1999). The nuclear receptor fetoprotein transcription factor is coexpressed with its target gene hnf-3beta in the developing murine liver, intestine and pancreas. *Mech. Dev.* **89**, 185–188.
- Rieck, S., Bankaitis, E. D. and Wright, C. V. E. (2012). Lineage determinants in early endocrine development. *Sem. Cell Dev. Biol.* **23**, 673–684.
- Rojas, A., Schachterle, W., Xu, S.-M. and Black, B. L. (2009). An endoderm-specific transcriptional enhancer from the mouse Gata4 gene requires GATA and homeodomain protein-binding sites for function in vivo. *Dev. Dyn.* **238**, 2588–2598.
- Rose, S. D., Swift, G. H., Peyton, M. J., Hammer, R. E. and MacDonald, R. J. (2001). The role of PTF1-P48 in pancreatic acinar gene expression. *J. Biol. Chem.* **276**, 44018–44026.
- Roux, E., Strubin, M., Hagenbuchle, O. and Wellauer, P. K. (1989). The cell-specific transcription factor PTF1 contains two different subunits that interact with the DNA. *Genes Dev.* **3**, 1613–1624.
- Sablin, E. P., Krylova, I. N., Fletterick, R. J. and Ingraham, H. A. (2003). Structural basis for ligand-independent activation of the orphan nuclear receptor LRH-1. *Mol. Cell* **11**, 1575–1585.
- Sakai, D., Suzuki, T., Osumi, N. and Wakamatsu, Y. (2006). Cooperative action of Sox9, Snail2 and PKA signaling in early neural crest development. *Development* **133**, 1323–1333.
- Schaffer, A. E., Freude, K. K., Nelson, S. B. and Sander, M. (2010). Nkx6 transcription factors and Ptf1a function as antagonistic lineage determinants in multipotent pancreatic progenitors. *Dev. Cell* **18**, 1022–1029.
- Serup, P. (2012). Signaling pathways regulating murine pancreatic development. *Sem. Cell Dev. Biol.* **23**, 663–672.
- Solar, M., Cardalda, C., Houbracken, I., Martín, M., Maestro, M. A., De Medts, N., Xu, X., Grau, V., Heimberg, H., Bouwens, L. et al. (2009). Pancreatic exocrine duct cells give rise to insulin-producing beta cells during embryogenesis but not after birth. *Dev. Cell* **17**, 849–860.
- Suzuki, T., Kasahara, M., Yoshioka, H., Morohashi, K.-i. and Umesono, K. (2003). LXXLL-related motifs in Dax-1 have target specificity for the orphan nuclear receptors Ad4BP/SF-1 and LRH-1. *Mol. Cell. Biol.* **23**, 238–249.
- Thompson, N., Gesina, E., Scheinert, P., Bucher, P. and Grapin-Botton, A. (2012). RNA profiling and chromatin immunoprecipitation-sequencing reveal that PTF1a stabilizes pancreas progenitor identity via the control of MNX1/HLXB9 and a network of other transcription factors. *Mol. Cell. Biol.* **32**, 1189–1199.
- Venteclef, N., Jakobsson, T., Ehrlund, A., Damdimopoulos, A., Mikkonen, L., Ellis, E., Nilsson, L.-M., Parini, P., Janne, O. A., Gustafsson, J.-A. et al. (2010). GPS2-dependent corepressor/SUMO pathways govern anti-inflammatory actions of LRH-1 and LXRbeta in the hepatic acute phase response. *Genes Dev.* **24**, 381–395.
- Villasenor, A., Chong, D. C., Henkemeyer, M. and Cleaver, O. (2010). Epithelial dynamics of pancreatic branching morphogenesis. *Development* **137**, 4295–4305.
- von Figura, G., Morris, J. P., Wright, C. V. E. and Hebrok, M. (2014). Nr5a2 maintains acinar cell differentiation and constrains oncogenic Kras-mediated pancreatic neoplastic initiation. *Gut* **63**, 656–664.
- Wagner, R. T., Xu, X., Yi, F., Merrill, B. J. and Cooney, A. J. (2010). Canonical Wnt/beta-catenin regulation of liver receptor homolog-1 mediates pluripotency gene expression. *Stem Cells* **28**, 1794–1804.
- Wells, J. M., Esni, F., Boivin, G. P., Aronow, B. J., Stuart, W., Combs, C., Sklenka, A., Leach, S. D. and Lowy, A. M. (2007). Wnt/beta-catenin signaling is required for development of the exocrine pancreas. *BMC Dev. Biol.* **7**, 4.
- Xu, P.-L., Liu, Y.-Q., Shan, S.-F., Kong, Y.-Y., Zhou, Q., Li, M., Ding, J.-P., Xie, Y.-H. and Wang, Y. (2004). Molecular mechanism for the potentiation of the transcriptional activity of human liver immunoprecipitation-sequence reveal that PTF1a stabilizes pancreas progenitor identity via the control of MNX1/HLXB9 and a network of other transcription factors. *Mol. Cell. Biol.* **32**, 1189–1199.
- Xuan, S., Borok, M. J., Decker, K. J., Battle, M. A., Duncan, S. A., Hale, M. A., MacDonald, R. J. and Sussel, L. (2012). Pancreas-specific deletion of mouse Gata4 and Gata6 causes pancreatic agenesis. *J. Clin. Invest.* **122**, 3516–3528.
- Zhou, Q., Law, A. C., Rajagopal, J., Anderson, W. J., Gray, P. A. and Melton, D. A. (2007). A multipotent progenitor domain guides pancreatic organogenesis. *Dev. Cell* **13**, 103–114.
